# Supplementary material for: Long-Term Effectiveness of the Midwifery Initiated Oral Health-Dental Service Program on Maternal Oral Health Knowledge, Preventative Dental Behaviours and the Oral Health Status Of Children In Australia
Source: Research Square preprint supplement (doi:10.21203/rs.3.rs-723870/v1), 2021-07-21
Supplement: Supplementary file 1 [file 9895855439b4ec336608b9e6.docx]

**Supplement 3: Crosstabulations and correlations for regression model**

**Table 1: Crosstabulations of categorical variables with dmft > 1 (N=164)**

| **Variable** | **dmft < 1** | **dmft > 1** | **Pearson’s Chi(df)** | **p-value** |
| --- | --- | --- | --- | --- |
| MIOH group† |  |  |  |  |
| Control or group 1 | 80(76.2) | 25(23.8) | 0.588(1) | 0.443 |
| MIOH DS group | 48(81.4) | 11(18.6) |
|  |  |  |  |  |
| Current problems with teeth, gums or mouth† |  |  |  |  |
| No | 74(77.9) | 21(22.1) | 0.003(1) | 0.955 |
| Yes | 54(78.3) | 15(21.7) |
|  |  |  |  |  |
| Current problems with teeth, gums or mouth#‡ |  |  |  |  |
| No | 56(86.2) | 9(13.8) | 3.339(1) | 0.068 |
| Yes | 72(74.2) | 25(25.8) |
|  |  |  |  |  |
| Problems with teeth, gums or mouth during pregnancy*˧ |  |  |  |  |
| No | 56(82.4) | 12(17.6) | 0.08(1) | 0.777 |
| Yes | 62(80.5) | 15(19.5) |
|  |  |  |  |  |
| Sought dental advice for problem#˩ |  |  |  |  |
| No | 54(77.1) | 16(22.9) | 1.558(1) | 0.212 |
| Yes | 23(65.7) | 12(34.3) |
|  |  |  |  |  |
| Regularly saw a dentist every year#‡ |  |  |  |  |
| No | 77(73.3) | 28(26.7) | 3.598(1) | 0.058 |
| Yes | 50(86.2) | 8(13.8) |
|  |  |  |  |  |
| Sought advice for problem during pregnancy*˧ |  |  |  |  |
| No | 59(78.7) | 16(21.3) | 0.754(1) | 0.385 |
| Yes | 59(84.3) | 11(15.7) |
|  |  |  |  |  |
| Sought dental advice for problem˩ |  |  |  |  |
| No | 12(57.1) | 9(42.9) | 7.913(1) | 0.005 |
| Yes | 42(87.5) | 6(12.5) |
|  |  |  |  |  |
| Received oral health information during pregnancy*˧ |  |  |  |  |
| No | 10(66.7) | 5(33.3) | 2.743(1) | 0.098 |
| Yes | 105(84) | 20(16) |
|  |  |  |  |  |
| Received oral health in early childhood information ˥ |  |  |  |  |
| No | 50(83.3) | 10(16.7) | 1.587(1) | 0.208 |
| Yes | 71(74.7) | 24(25.3) |
|  |  |  |  |  |
| Visited a dentist in the last 12 months‡ |  |  |  |  |
| No | 88(77.9) | 25(22.1) | 0.059(1) | 0.807 |
| Yes | 39(79.6) | 10(20.4) |
|  |  |  |  |  |
| Received information about oral health care during pregnancy#‡ |  |  |  |  |
| No | 120(78.9) | 32(21.1) | 1.397(1) | 0.237 |
| Yes | 7(63.6) | 4(36.4) |
|  |  |  |  |  |
| Dental decay can spread from the mother's mouth to the baby's mouth#† |  |  |  |  |
| Incorrect | 95(82.6) | 20(17.4) | 4.671(1) | 0.031 |
| Correct | 33(67.3) | 16(32.7) |
|  |  |  |  |  |
| Dental decay can spread from the mother's mouth to the baby's mouth*˧ |  |  |  |  |
| Incorrect | 24(75.0) | 8(25.0) | 1.055(1) | 0.304 |
| Correct | 93(83.0) | 19(17.0) |
|  |  |  |  |  |
| Sleeping with a bottle containing formula could cause holes on a baby's teeth#† |  |  |  |  |
| Incorrect | 39(72.2) | 15(27.8) | 1.595(1) | 0.207 |
| Correct | 89(80.9) | 21(19.1) |
|  |  |  |  |  |
| Sleeping with a bottle containing formula could cause holes on a baby's teeth*˧ |  |  |  |  |
| Incorrect | 7(58.3) | 5(41.7) | 4.513(1) | 0.034 |
| Correct | 110(83.3) | 22(16.7) |
|  |  |  |  |  |
| Cavities on baby teeth are OK because they will fall out anyway#† |  |  |  |  |
| Incorrect | 8(66.7) | 4(33.3) | 0.979(1) | 0.322 |
| Correct | 120(78.9) | 32(21.1) |
|  |  |  |  |  |
| Cavities on baby teeth are OK because they will fall out anyway*˧ |  |  |  |  |
| Incorrect | 4(57.1) | 3(42.9) | 2.807(1) | 0.094 |
| Correct | 113(82.5) | 24(17.5) |
|  |  |  |  |  |
| When is the best time for baby to have the first dental visit?# † |  |  |  |  |
| Incorrect | 54(78.3) | 15(21.7) | 0.003(1) | 0.955 |
| Correct | 74(77.9) | 21(22.1) |
|  |  |  |  |  |
| When is the best time for baby to have the first dental visit?*˧ |  |  |  |  |
| Incorrect | 47(81.0) | 11(19.0) | 0.003(1) | 0.957 |
| Correct | 70(81.4) | 16(18.6) |
|  |  |  |  |  |
| A child’s first dental visit should be: † |  |  |  |  |
| Incorrect | 88(77.2) | 26(22.8) | 0.16(1) | 0.689 |
| Correct | 40(80.0) | 10(20.0) |
|  |  |  |  |  |
| Having healthy baby teeth is not as important as having healthy permanent teeth because baby teeth will fall out† |  |  |  |  |
| Incorrect | 8(72.7) | 3(27.3) | 0.195(1) | 0.659 |
| Correct | 120(78.4) | 33(21.6) |
|  |  |  |  |  |
| It is ok to use the same spoon to taste baby’s food. † |  |  |  |  |
| Incorrect | 17(73.9) | 6(26.1) | 0.267(1) | 0.605 |
| Correct | 111(78.7) | 30(21.3) |
|  |  |  |  |  |
| It is safe to put baby to bed with a bottle of milk† |  |  |  |  |
| Incorrect | 11(57.9) | 8(42.1) | 5.095(1) | 0.024 |
| Correct | 117(80.7) | 28(19.3) |
|  |  |  |  |  |
| What is your combined average fortnightly household income? † |  |  |  |  |
| $700 or less | 1(50.0) | 1(50.0) | 14.214(6) | 0.027 |
| Between $700 to $1,200 | 16(57.1) | 12(42.9) |
| Between $1,200 to $2,000 | 24(82.8) | 5(17.2) |
| Between $2,000 to $3,000 | 25(86.2) | 4(13.8) |
| More than $3,000 | 24(77.4) | 7(22.6) |
| Don’t know | 27(93.1) | 2(6.9) |
| Refused | 11(68.8) | 5(31.3) |
|  |  |  |  |  |
| How do you perceive your child’s oral health? † |  |  |  |  |
| Poor | 1(25.0) | 3(75.0) | 20.526(3) | <0.001 |
| Average | 9(50.0) | 9(50.0) |
| Good | 56(76.7) | 17(23.3) |
| Very Good | 62(89.9) | 7(10.1) |
|  |  |  |  |  |
| Do you currently have any concerns with your child’s teeth, gums or mouth? † |  |  |  |  |
| No | 106(86.9) | 16(13.1) | 21.711(1) | <0.001 |
| Yes | 22(52.4) | 20(47.6) |
|  |  |  |  |  |
| Have your child’s dental problems affected what they eat and their overall health in general? ˩ |  |  |  |  |
| Sometimes | 0(0.0) | 4(100.0) | 4.692(1) | 0.030 |
| Never | 20(57.1) | 15(42.9) |
|  |  |  |  |  |
| Have you taken your child to a dental professional for this problem/concern? ˩ |  |  |  |  |
| No | 11(50) | 11(50) | 0.105(1) | 0.746 |
| Yes | 11(55) | 9(45) |
|  |  |  |  |  |
| Does your child regularly see a dentist every year? ‡ |  |  |  |  |
| No | 71(77.2) | 21(22.8) | 0.027(1) | 0.870 |
| Yes | 54(78.3) | 15(21.7) |
|  |  |  |  |  |
| How often are your child’s teeth brushed with toothpaste? ‡ |  |  |  |  |
| Less than once a day | 8(88.9) | 1(11.1) | 2.387(3) | 0.496 |
| Once a day | 66(80.5) | 16(19.5) |
| Twice a day | 52(74.3) | 18(25.7) |
| More than twice a day | 1(50.0) | 1(50.0) |
|  |  |  |  |  |
| Does your child drink juice at least once a day? ‡ |  |  |  |  |
| No | 94(80.3) | 23(19.7) | 1.42(1) | 0.233 |
| Yes | 33(71.7) | 13(28.3) |
|  |  |  |  |  |
| Does your child drink soft drink at least once a day? ‡ |  |  |  |  |
| No | 126(79.7) | 32(20.3) | 10.054(1) | 0.002 |
| Yes | 1(20.0) | 4(80.0) |
|  |  |  |  |  |
| Does your child consume cakes or biscuits at least once a day? ‡ |  |  |  |  |
| No | 97(79.5) | 25(20.5) | 0.716(1) | 0.397 |
| Yes | 30(73.2) | 11(26.8) |
|  |  |  |  |  |
| Does your child consume confectionary at least once a day? ‡ |  |  |  |  |
| No | 111(77.1) | 33(22.9) | 0.495(1) | 0.481 |
| Yes | 16(84.2) | 3(15.8) |
|  |  |  |  |  |
| How often does your child drink from a bottle? † |  |  |  |  |
| 1. Never | 104(75.4) | 34(24.6) | 4.565(4) | 0.335 |
| 2 | 11(100.0) | 0(0.0) |
| 3 | 11(84.6) | 2(15.4) |
| 4 | 1(100.0) | 0(0.0) |
| 5. Always | 1(100.0) | 0(0.0) |
|  |  |  |  |  |
| How often does your child drink juice or fizzy drink from a bottle? ˩ |  |  |  |  |
| 1. Never | 56(80.0) | 14(20.0) | - | - |
| 2 | 0(0.0) | 0(0.0) |
| 3 | 0(0.0) | 0(0.0) |
| 4 | 0(0.0) | 0(0.0) |
| 5. Always | 0(0.0) | 0(0.0) |
|  |  |  |  |  |
| Has your child regularly used a dummy or pacifier? † |  |  |  |  |
| Yes | 57(82.6) | 12(17.4) | 1.446(1) | 0.229 |
| No | 71(74.7) | 24(25.3) |
|  |  |  |  |  |
| Do you/have you ever shared spoons or eating utensils while feeding your child? † |  |  |  |  |
| No | 52(81.3) | 12(18.8) | 0.628(1) | 0.428 |
| Yes | 76(76) | 24(24) |
|  |  |  |  |  |
| Do you/have you ever used your mouth to clean a pacifier for your child? † |  |  |  |  |
| No | 111(78.7) | 30(21.3) | 0.267(1) | 0.605 |
| Yes | 17(73.9) | 6(26.1) |
|  |  |  |  |  |
| Do you/have you ever used your mouth to clean a pacifier for your child? † |  |  |  |  |
| No | 126(80.3) | 31(19.7) | 10.448(1) | 0.001 |
| Yes | 2(28.6) | 5(71.4) |
|  |  |  |  |  |
| Tested positive for Streptococcus mutans ˥ |  |  |  |  |
| No | 105(84.7) | 19(15.3) | 15.833(1) | <0.001 |
| Yes | 16(51.6) | 15(48.4) |
|  |  |  |  |  |
| Tested positive for Lactobacillus ˥ |  |  |  |  |
| No | 103(83.7) | 20(16.3) | 11.206(1) | 0.001 |
| Yes | 18(56.3) | 14(43.8) |

#Question from MIOH pre questionnaire

*Question from MIOH post questionnaire

†0 Missing cases

‡1-5 missing cases

˥5-10 missing cases

˧10-25 missing cases

˩More than 50 missing cases

**Table 2: Correlations of continuous variables with DMFT**

|  |  | **DMFT MIOH kids** | **Total Knowledge MIOH kids** | **DMFT post MIOH** |
| --- | --- | --- | --- | --- |
| **DMFT (Total)** | Pearson Correlation | 1 | -0.0225 | -0.094 |
| Sig. (2-tailed) |  | 0.837 | 0.384 |
| **TotalKnowledge** | Pearson Correlation | -0.022 | 1 | -0.031 |
| Sig. (2-tailed) | 0.837 |  | 0.775 |
| **4. d) (total DMF) Post** | Pearson Correlation | -0.094 | -0.031 | 1 |
| Sig. (2-tailed) | 0.384 | 0.775 |  |

Listwise N=88
